1 Assessing and Maximizing Cultivated Diversity with Plate-Wash PCR and High Throughput  
2 Sequencing

3

4 Emily N. Junkins<sup>a</sup> and Bradley S. Stevenson<sup>a#</sup>

5

6 <sup>a</sup>Department of Microbiology and Plant Biology, University of Oklahoma, Norman, OK, USA

7

8 Running Head: Using sequencing to measure cultivated diversity

9

10 #Address correspondence to Bradley S. Stevenson, [bradley.stevenson@ou.edu](mailto:bradley.stevenson@ou.edu)

11

12 Abstract word count: 359

13

14 Text (excluding Materials and Methods, references, tables, and figure legends) word count: 4129

15

16

17

18

19

20

21

22

23

24

## 25 **Abstract**

26           Molecular techniques continue to reveal a growing disparity between the immense  
27 diversity of microbial life and the small proportion that is in pure culture. The disparity,  
28 originally dubbed “the great plate count anomaly” by Staley and Konopka, has become even  
29 more vexing given our increased understanding of the importance of microbiomes to a host and  
30 the role of microorganisms in the vital biogeochemical functions of our biosphere. Searching for  
31 novel antimicrobial drug targets often focuses on screening a broad diversity of microorganisms.  
32 If diverse microorganisms are to be screened, they need to be cultivated. Recent innovative  
33 research has used molecular techniques to assess the efficacy of cultivation efforts, providing  
34 invaluable feedback to cultivation strategies for isolating targeted and/or novel microorganisms.  
35 Here, we aimed to determine the efficiency of cultivating representative microorganisms from a  
36 non-human, mammalian microbiome, identify those microorganisms, and determine the  
37 bioactivity of isolates. Molecular methods indicated that around 57% of the ASVs detected in the  
38 original inoculum were cultivated in our experiments, but nearly 53% of the total ASVs that  
39 were present in our cultivation experiments were *not* detected in the original inoculum. In light  
40 of our controls, our data suggests that when molecular tools were used to characterize our  
41 cultivation efforts, they provided a more complete, albeit more complex, understanding of which  
42 organisms were present compared to what was eventually cultivated. Lastly, about 3% of the  
43 isolates collected from our cultivation experiments showed inhibitory bioactivity against a  
44 multidrug-resistant pathogen panel, further highlighting the importance of informing and  
45 directing future cultivation efforts with molecular tools.

## 46 **Importance**

47 Cultivation is the definitive tool to understand a microorganism's physiology,  
48 metabolism, and ecological role(s). Despite continuous efforts to hone this skill, researchers are  
49 still observing yet-to-be cultivated organisms through high-throughput sequencing studies. Here,  
50 we use the very same tool that highlights biodiversity to assess cultivation efficiency. When  
51 applied to drug discovery, where screening a vast number of isolates for bioactive metabolites is  
52 common, cultivating redundant organisms is a hindrance. However, we observed that cultivating  
53 in combination with molecular tools can expand the observed diversity of an environment and its  
54 community, potentially increasing the number of microorganisms to be screened for natural  
55 products.

56

## 57 **Introduction**

58 Molecular techniques and sequencing technologies have helped to describe many  
59 microbial communities and provide tools that allow us to study representative microorganisms  
60 and their activities without isolation. Application of molecular approaches to the study of  
61 microbiology have led to the discovery and characterization of rare biospheres of the most  
62 extreme environments (1) and enabled researchers to decipher the metabolic potential and  
63 activity of microorganisms from the human gut (2) to the bottom of the ocean (3). Now, changes  
64 in microbial community structure and function can be monitored with molecular techniques  
65 throughout the course of a disease (4) or with changing environmental conditions (5), such that  
66 we may begin to predict the roles of microbial populations and outcomes over time (6, 7).

67 Isolating, or even just cultivating representative microorganisms is still considered the  
68 best means towards understanding their physiology, metabolism, and potential ecological roles,  
69 but this remains to be a major hurdle. The degree to which any microbial community is

70 represented in culture varies considerably. Since Staley and Konopka coined the term “great  
71 plate count anomaly” (8), numerous studies have sought to quantify the culturable organisms  
72 from various biomes (see (9) for a compiled list of most probable number (MPN) based  
73 approaches). A recent study estimated that 81% of all microbial cells on Earth belong to  
74 uncultured genera or higher classifications and about 25% of microbial cells are from uncultured  
75 phyla (9). Specifically, 26% of marine, 31% of host-associated, 31% of eutrophic lakes, and 30%  
76 of soil metagenomic sequences have cultured representatives at the family level (9). Not  
77 surprisingly, human associated microbiomes have more cultured representatives, likely affected  
78 by a focused effort (10). Sequencing technology has shed light onto the previously unknown  
79 diversity of the microbial world, outpacing our ability to cultivate these organisms by an  
80 estimated rate of 2.4- and 2.5-fold for bacteria and archaea, respectively (11).

81       Efforts to isolate yet uncultured microorganisms have gathered momentum as researchers  
82 have begun to apply new technologies and innovations (12-14). Microbiologists routinely  
83 manipulate the composition of growth media and treatments of the inocula in order to increase  
84 the diversity of microorganisms represented in culture (e.g., (14-22)). As an example, treating an  
85 inoculum with ethanol can select for spore-forming bacteria by killing vegetative cells and  
86 leaving spores intact that would otherwise be overgrown and remain un-isolated (23).  
87 Furthermore, antioxidants in media can support the cultivation of both aerobic and anaerobic  
88 organisms, by using compounds that alleviate oxidative stress (24, 25). With the goal of this  
89 study being to cultivate many, different microorganisms, the approaches described above were of  
90 particular interest. We hypothesized that they would select for gut-associated bacteria;  
91 antioxidants would help mitigate oxygen stress for organisms best suited for microoxic or anoxic  
92 environments, and ethanol treatment would reduce the abundant vegetative cells, allowing us to

93 better access the many spore-forming taxa that reside in the gut.

94           When cultivation approaches are coupled with molecular analyses, the total diversity and  
95 identity of cultivated taxa can be determined (26-28), and specific, targeted taxa can be detected  
96 (13). More recently, high throughput sequencing has made it possible to quantify exactly what  
97 proportion of the original sample has been cultivated (26, 29, 30). Studies using this approach  
98 showed that roughly 23% of microorganisms in bovine rumen fluid were cultivable in liquid  
99 enrichments (29), while 96% of those in human bronchoalveolar lavage samples (30), and 60%  
100 of those detected in/on American toads (26) were cultivated. A recent study characterized the  
101 microbial diversity within the same inoculum spread onto both high- and low-nutrient media by  
102 harvesting biomass on each plate and identifying all taxa present (26). Their approach built upon  
103 a previous study that sought to isolate abundant but yet-uncultured taxa using defined, low  
104 nutrient media and a PCR-based screening approach using group specific primers, termed plate-  
105 wash PCR (PWPCR) (13). Medina et al. confirmed that low nutrient-media would allow for the  
106 growth of a more diverse subset of bacteria from the original sample and that molecular  
107 screening (i.e., 16S PWPCR) is a practical way to characterize the microbial community growing  
108 on an entire agar plate (26). This data is invaluable in identifying medium composition, inoculum  
109 treatments, and incubation conditions that can target certain taxa, or maximize the cultivated  
110 diversity for large-scale isolation efforts (see 16, 18). However, these studies using solid agar  
111 plates may have overestimated diversity for some taxa by focusing on the relative abundance of  
112 taxa in their analyses (see Discussion).

113           Pure cultures have always been the “gold standard” for the in-depth study of  
114 microorganisms. The need for isolation is especially important when screening for the  
115 production of secondary metabolites for drug discovery. Historically, the process of isolating

116 microorganisms for drug discovery has relied mainly on high throughput cultivation efforts that  
117 increase the number of isolates being screened (e.g., (31-33)), enrich for bioactive production  
118 from known producers like *Streptomyces* spp. (34), or focus on novel or rare taxa thought to  
119 have uncharacterized biosynthetic capabilities (35-37). We aimed to do the same by sampling a  
120 diverse, host-associated microbial community and cultivating them under conditions designed to  
121 obtain as many different organisms as possible through the use of different media types.  
122 Screening cultivated microorganisms with the broadest diversity is expected to provide the  
123 greatest chance of uncovering natural products that are novel drug targets. Previous studies have  
124 focused on extreme environments for novel natural products (38), but we expand on this idea to  
125 include non-human mammals. We predicted that this would increase the diversity of  
126 microorganisms and compounds screened for useful antimicrobial compounds and argue that the  
127 shared life-history between a host and its host-associated microbial communities may produce  
128 compounds that are relatively less cytotoxic to the host. This idea was originally supported by a  
129 survey of microbiomes collected from roadkill mammals, which produced two new cyclic  
130 lipodepsipeptides of pharmaceutical interest (33).

131         Here, we sought to use both general and selective media along with various treatments to  
132 the inocula to collectively enrich for as many different microorganisms as possible from the oral  
133 and gut microbiomes of a roadkill mammal (raccoon). The goals for this study were to (i)  
134 compare the diversity of cultured bacterial communities on multiple types of media combined  
135 with various treatments of the inoculum, (ii) determine which media, treatments, or combination  
136 cultivated the highest richness of bacterial taxa, and (iii) determine how many isolates produced  
137 bioactive molecules against a panel of multi-drug resistant pathogenic microorganisms.

138

## 139 **Materials and Methods**

### 140 **Sample Collection and Storage**

141 A 3 mile stretch of Oklahoma State Highway 9 in Norman, OK between the University of  
142 Oklahoma, Norman campus and Lake Thunderbird was used for our opportunistic sampling area.  
143 This well-traveled highway runs through undeveloped prairie, scrub and forest, cattle ranches,  
144 and rural residential land, providing many mammalian roadkill specimens. Sample collection  
145 was conducted under Oklahoma Scientific Collector Permit #5250 (33). The oral cavity and  
146 rectum of a racoon (*Procyon lotor*) deceased less than 8 h was sampled in triplicate (n=3) with  
147 sterile, nylon swabs. To ensure equal biomass was collected for immediate sequencing and  
148 subsequent cultivation, two swabs were used to sample each orifice simultaneously (to increase  
149 amount of sample) and stored together in a sterile conical tube containing 3.0 mL 1X PBS, stored  
150 on ice, and immediately transferred back to the laboratory (under 45 minutes). At the laboratory,  
151 each set of swabs was vortexed to suspend cells. A 900  $\mu$ L aliquot of the cell suspension  
152 intended for molecular analysis was centrifuged at 10,000 x g for 1 min, the supernatant was  
153 removed. The cell pellet was resuspended in 750  $\mu$ L of BashingBead Buffer (Zymo Research  
154 Corp.) and transferred to BashingBead Lysis Tubes (Zymo Research Corp., Irvine, CA) prior to  
155 lysis through homogenization in a Mini-BeadBeater-8 (BioSpec Products Inc., Bartlesville, OK)  
156 at maximum speed for 45 seconds. Homogenized samples were then stored at -20°C until needed  
157 for DNA extraction. For cultivation, the remaining 2.1 mL of the cell suspension for each sample  
158 was serially diluted with PBS. Aliquots of 50  $\mu$ L from the  $10^0$ - $10^{-6}$  dilutions were spread onto 13  
159 different media/treatment combinations (see Table S1). This 2.1 mL volume represented the  
160 exact amount needed for cultivation with no suspension left over so that the  $10^0$  dilution was not  
161 diluted and represented the surface area of the swab. In all, each inoculum was spread onto the

162 agar media, in triplicate, for each media type and incubated for 6 days at 30°C.

163

### 164 **Culture-Dependent Bacterial Community Analysis**

165 Cultivation was conducted with a combination of broad-spectrum media with decreased  
166 nutrients and selective media in order to “cast a wide net” and maximize the cultivable diversity  
167 of each inoculum (see quasi-factorial design in Table S1). The media used included 0.1X  
168 strength tryptic soy broth (Bacto, USA) with 1.5% agar, ROXY and derivatives with hemin (0.1  
169 g/L) and alpha-ketoglutarate (2.0 g/L) (25), 0.25X strength R2A medium (15), and blood agar  
170 (per L: 10.0 g meat extract, 10.0 g peptone, 5.0 g sodium chloride, 15 g agar, 5% sheep’s blood  
171 (ThermoFisher, USA), pH 7). To date, this is the first instance using ROXY medium and plate-  
172 wash PCR techniques. In addition to different media types, one variation included the  
173 pretreatment of the inocula for 4 hours in 70% ethanol at 22-24°C (23). Catalase (40,000 U/L)  
174 was added as a treatment to TSA, ROXY and R2A to remove peroxides produced during  
175 autoclaving (19, 20). The last treatment included the addition of streptomycin at 50 mg/L as a  
176 broad spectrum selection agent against Gram-negative and some Gram-positive species (39).

177 To test which combinations of media and treatments resulted in cultivated communities  
178 that represented the diversity observed in the original sample, we grew each inoculum (mouth or  
179 rectum) on each combination of media/treatment types and sequenced the resulting biomass.

180

### 181 **Collection of Total Biomass from Agar Plates, DNA Extraction and PCR (PWPCR)**

182 Biomass was harvested from each agar plate in order to identify the microorganisms  
183 present and to compare this to culture-independent analyses of the inoculum. The biomass from  
184 each agar plate was harvested by adding 2.0 mL of PBS to the surface of the plate and



185 suspending the colony biomass by agitation with a sterile spreader. The suspended colony  
186 biomass was collected and transferred to a 2.0 mL microcentrifuge tube, pelleted at 10,000 x g  
187 for 1 min, and resuspended in 750 uL of BashingBead Buffer (Zymo Research Corp.). Each  
188 sample was transferred to a BashingBead Lysis Tube (Zymo Research Corp.) and homogenized  
189 for 45 seconds at maximum speed using a Mini-BeadBeater-8 (BioSpec Products Inc.,  
190 Bartlesville, OK). The lysed samples were stored at -20°C until DNA was extracted.

191

## 192 **DNA Extraction and Sequencing**

193 Before DNA extraction, each sample was thawed on ice and homogenized for 30 seconds  
194 at maximum speed using a Mini-BeadBeater-8 (BioSpec Products Inc., Bartlesville, OK). DNA  
195 was extracted according to manufacturer specifications using the Zymo *Quick*-DNA  
196 Fungal/Bacterial Miniprep kit (Cat# D6005, Zymo Research Corp., Irvine, CA). For community  
197 characterization, a conserved region of the SSU rRNA gene of most bacteria, archaea, and  
198 eukarya was amplified using primers 515F-Y and 926R (40) via the following PCR protocol:  
199 initial denaturation at 94°C for 2 min, followed by 30 cycles of denaturation at 94°C for 45 s,  
200 annealing at 50°C for 45 s, and extension at 68°C for 90 s, with a final extension at 68°C for 5  
201 min. These primers produced two amplicons, a ~400 bp fragment for bacteria and archaea, and a  
202 600 bp fragment for eukaryotes. The forward primer 515F-Y (5'-GTA AAA CGA CGG CCA  
203 G CCG TGY CAG CMG CCG CGG TAA-3') contains the M13 tag (underlined) fused to the 5'  
204 end of the forward primer (41). The reverse primer 926R (5'-CCG YCA ATT YMT TTR AGT  
205 TT-3') was unmodified from Parada et. al 2015. Each PCR contained 5 PRIME HOT master mix  
206 (1X; 5 PRIME Inc., Gaithersburg, MD), 0.2 µM of each primer, and 3.0 µL of extracted DNA at  
207 a final volume of 50 µL. The amplified fragments were purified using Sera-Mag magnetic beads

208 (GE) with the AmPureXP (Beckman Coulter) protocol at a final concentration of 1.8x v/v. After  
209 purification, 3  $\mu$ L of each PCR product, 1x 5 PRIME HOT master mix (Quantabio,  
210 Massachusetts, USA), 0.2 $\mu$ M of the 926R primer, and 0.2  $\mu$ M of a specific 12 bp oligonucleotide  
211 was used in a separate barcoding PCR (6 cycles) in 50  $\mu$ L reactions to attach a unique barcode to  
212 amplicons of each library. The same thermocycler protocol was used as above but only run for 6  
213 cycles. The now barcoded amplicons were purified using Sera-Mag (GE) beads with the  
214 AmPureXP (Beckman Coulter) protocol to a final volume of 40  $\mu$ L, quantified using the QuBit  
215 HS DS DNA assay kit (Thermo Fisher Scientific Inc., Waltham, MA), and pooled in equimolar  
216 amounts. The pooled, barcoded amplicon libraries were then concentrated to a final volume of 40  
217  $\mu$ L (209 ng/  $\mu$ L) with an Amicon-Ultra filter (Millipore, Burlington, MA, USA) following  
218 manufacturer's protocol. The combined amplicon libraries were denatured according to Miseq  
219 library preparations protocol (Illumina, San Diego, CA, USA). The sample was loaded at a  
220 concentration of 10 pM and sequenced using 2x250 paired-end strategy on the Miseq (Illumina  
221 San Diego, CA, USA) platform for 251 cycles.

222

### 223 **ASV Inference and Bacterial Community Characterization**

224 Barcodes from raw SSU rRNA amplicon sequences were removed and demultiplexed  
225 using QIIME v 1.9.1 (42). Demultiplexed reads were trimmed for adapters and quality filtered as  
226 a part of the *dada2* pipeline (43) and amplicon sequence variants (ASVs) were inferred using the  
227 forward reads (203 bp). Taxonomy was assigned using the SILVA database v32 (44, 45). The  
228 final dataset consisted of ~1.7 million reads resulting in 463 ASVs with a median of 17,347  
229 sequences per sample (min = 132, max= 266,678).

230

231 **Data Availability:** Sequence data has been deposited at NCBI's Sequence Read Archive (SRA)  
232 database under accession number [PRJNA675861](https://www.ncbi.nlm.nih.gov/bioproject/PRJNA675861).

233

## 234 **Data Analysis**

235 Community diversity was analyzed using the *phyloseq* (46) and *vegan* (47) packages in  
236 R. Relative abundance was only used to directly assess the diversity of the original inocula.  
237 Presence/absence and richness were used as the main metrics to compare cultivated samples  
238 because of the variation in biomass (i.e. colony size) between microbial colonies on and between  
239 agar plates. Also, because of the sampling procedure with duplicate swabs used in triplicate, the  
240 data from the molecular control was pooled for analysis since the variability in swabbing would  
241 be different than the variability of triplicates resulting from cultivation.

242 Alpha diversity was calculated using richness of ASVs, while beta diversity was  
243 measured with non-metric multidimensional scaling (NMDS) using Jaccard distances. Statistical  
244 comparisons across media types, treatment, and orifices were done using permanova with the  
245 *adonis2* function in the *vegan* package (47). Due to the nestedness of orifice and cultivation  
246 conditions, orifice was used as a strata or fixed factor, and media and treatment were used as  
247 predictor variables (~media\*treatment). Communities were also compared without using orifice  
248 as a fixed factor to capture any influence that orifice could have on the cultivable communities.  
249 To fully understand the significance described in the permanova, a permdisp with the *betadisper*  
250 function in *vegan* was used to describe any within sample variance (i.e. across replicate agar  
251 plates) that could explain any significant differences detected in the permanova. Hypothesis  
252 testing via anova with permutations (n=999) was used with permdisp to determine any  
253 significant differences in variation within samples.

254 To identify certain ASV families more associated with an orifice, medium, or treatment, a  
255 species indicator analysis was performed using the *indicspecies* package (permutations = 999)  
256 (48, 49).

257

## 258 **Bioassays and Isolate Identification**

259 Colonies were selected for isolation based on morphology, with the intent of sampling as  
260 many different colony morphologies as possible. From average of  $8.1 \times 10^{10}$  CFUs/mL cultivated  
261 across all medium types and dilutions, a total 238 colonies were chosen for isolation based on  
262 differential colony morphology from the mouth and rectum on a subset of the media types (0.1X  
263 TSA, ROXY with alpha-ketoglutarate and hemin, and 0.25X R2A). To determine bioactivity,  
264 soft agar overlays in 0.1X TSA (0.8% agar) were used to test for growth inhibition of a panel of  
265 drug-resistant pathogens (*Klebsiella pneumonia* ATCC# 13883, *Enterococcus faecium* ATCC#  
266 51559, *Pseudomonas aeruginosa* ATCC# 10145, and *Candida albicans* ATCC# 565304). To  
267 prepare for the bioassay, pathogens were incubated overnight, shaking at 250 rpm at 30°C, in  
268 0.1X tryptic soy broth (TSB) (Bacto, USA). A 400  $\mu$ L aliquot of each pathogen was used to  
269 inoculate 3.6 mL of molten TSA soft agar (at 55 °C), mixed, and immediately poured onto a  
270 0.1X TSA agar plate for a final overlay volume of 4 mL. Colony material from each isolate was  
271 transferred to the bioassay plate with a sterile toothpick by etching an 'X' into the overlay. The  
272 inoculated bioassay plates were incubated at 30 °C for 24 hours. Inhibition of the pathogen in the  
273 overlay was characterized by a zone of clearing surrounding the isolate (Figure S1). For  
274 cryopreservation, each isolate was grown in 5 mL of 0.1X TSB in a 16 x 150 mm test tube  
275 shaking at 250 rpm for 48 h. An aliquot of 800  $\mu$ L of the culture was transferred to a 2 mL screw  
276 cap tube, along with 200  $\mu$ L of 80% glycerol, for a final concentration of 20% glycerol. After

277 mixing by vortex for 30 s, it was then stored at -80°C.

278 Partial SSU rRNA sequences were used to identify each isolate. Genomic DNA was  
279 extracted from each isolate using QuickExtract (Lucigen, Wisconsin, USA) according to  
280 manufacturer's protocol from the above mentioned 0.1X TSB cultures. The SSU rRNA gene was  
281 amplified using primers 8F (3'-ATGC-5') and 1492R (3'-ATGC-5') at a concentration of 0.2  
282 µM, 1x 5 PRIME HOT master mix (Quantabio, Massachusetts, USA) , and 2.0 µL of DNA  
283 template per 50 µL reaction via the following PCR protocol: initial denaturation at 94°C for 2  
284 min, followed by 30 cycles of denaturation at 94°C for 30 s, annealing at 55°C for 45 s, and  
285 extension at 72°C for 45 s, with a final extension at 72°C for 10 min. Amplified fragments were  
286 purified using Sera-Mag magnetic beads (GE) with the AmPureXP (Beckman Coulter) protocol  
287 at a final concentration of 1.8x v/v. Purified amplicons (a total of 192 samples) were sent for  
288 Sanger sequencing using the 8F primer (Genewiz, New Jersey, USA). Resulting sequences and  
289 chromatograms were assessed for quality using IGV (50). Sequences with low quality (< Q20)  
290 were removed, low quality ends were trimmed with MEGA X (51), and the final sequences were  
291 identified using the SILVA v. 132 classifier online server (44). A total of 117 isolates had  
292 suitable reads and met quality thresholds for taxonomic identification.

293

## 294 **Results**

295

### 296 **Cultivated Microbial Diversity Differed Between Orifice and Cultivation Condition**

297 As expected, a library of SSU rRNA genes from the original inocula showed that it had  
298 higher richness (alpha diversity) than the cultivated organisms from both orifices (Figure 1). The  
299 microbial community sampled from the rectum had higher overall richness (153 ASVs)

300 compared to that of the mouth (86 ASVs) (Figure 1). Overall, we were able to cultivate 57.3% of  
301 the ASVs detected in the inocula (58.1% from the mouth and 57.5% from the rectum).  
302 Interestingly, about half (52.7%) of the ASVs detected from the cultivation experiments were not  
303 represented in either library from the inocula (i.e. molecular control) (Figure 2). The number of  
304 ASVs detected on a certain medium or treatment differed between orifices. For instance,  
305 cultivation on TSA medium treated with catalase resulted in only 29 ASVs from the rectum  
306 inoculum compared to around 70 different ASVs from the mouth. The fewest number of ASVs  
307 was detected on the ROXY medium amended with alpha-ketoglutarate and hemin from both the  
308 mouth and rectum. The cultivated beta diversity differed based on orifice and cultivation  
309 condition. Specifically, community structure differed based on orifice and treatments, more so  
310 than base medium type (Figure 3). Differences in the cultivated community composition and  
311 diversity between medium and treatment confirmed that, collectively, using different cultivation  
312 techniques increased the number of organisms cultivated from each inoculum.

313

#### 314 **Selective Treatments Increased Cultivated Richness Compared to Media Type or Orifice**

315 An indicator species analysis was used to determine which microbial families were  
316 significantly associated with certain conditions. A total of ten families were identified to be  
317 significantly ( $p < 0.05$ ) associated with orifice, media type, and/or treatment. Only one family,  
318 Aeromonadaceae was significantly associated with a particular orifice, the mouth. This family  
319 was also the only family significantly ( $p = 0.001$ ) associated with a certain base medium type,  
320 ROXY (Table 1). Treatment of the medium and/or the inoculum selected for the most diverse set  
321 of indicator species, with a total of 9 families significantly ( $p < 0.05$ ) associated with a certain  
322 treatment or treatments (Table 1). Certain bacterial families like Staphylococcaceae and

323 Paenibacillaceae were associated with the ethanol pretreatment of inocula, whereas the  
324 Wohlfarhtimonodaceae and Metaschinikowiceae were more associated with the addition of  
325 streptomycin to media (Table 1).

326 Despite some unique taxa being associated with certain conditions, much of the cultivable  
327 microbial diversity was shared between the mouth and the rectum (Figure 4), indicated by the  
328 lack of significant differences in community structure described by the permanova and permdisp  
329 analyses (discussed below). Based on molecular analyses, 27 families were shared between the  
330 mouth and rectum before cultivation, while 6 families were unique to the mouth and 6 families  
331 were unique to the rectum. Negative cultivation controls (e.g., PBS) yielded no growth,  
332 supporting the assumption that any biomass collected from plates originated from the inoculum.  
333 Lastly, our cultivation experiments led to the detection of 18 families from the mouth and 8  
334 families from the rectum that were not detected with direct molecular analysis of the inoculum.  
335 This accounted for around half (52.7%) of the ASVs detected during cultivation (Figure 2). This  
336 could be explained by differences in biomass and growth characteristics not being captured by  
337 sequence data from the inocula (discussed below).

338

### 339 **The Raccoon Microbiome Contained Cultivable Bioactive Bacteria**

340 A total of 238 isolates were collected from a subset of media (0.25X R2A, 0.1X TSA,  
341 and ROXY with alpha-ketoglutarate and hemin). Many of these isolates were expected to be  
342 redundant, since the diversity of the initial inoculum was low (Figure 1). This was confirmed  
343 with many isolates redundant at the genus level and the majority of the identifiable isolates  
344 belonging to genera *Serratia* (34.2%) and *Klebsiella* (17.9%) (Figure S2). Each of the 238  
345 isolates was assayed for antimicrobial activity against a panel of multi-drug resistant pathogens.

346 A total of 7 isolates showed antimicrobial activity, identified as a zone of clearing of one of the  
347 antibiotic resistant panel organisms. This equated to a ~3% “hit” rate against already resistant  
348 organisms. Six of these isolates were recovered from the mouth, while one, a *Bacillus* sp., was  
349 recovered from the rectum. Three isolates were recovered from R2A, 3 from TSA and 1, an  
350 Enterobacteriaceae sp., from ROXYakgh. Three showed activity against *Klebsiella pneumonia*,  
351 three against *Enterococcus faecium*, and one, a *Pseudomonas* sp., against *Candida albicans*. Five  
352 of the isolates were identified by partial 16S rRNA sequence identity (Table 2).

353

### 354 **The Composition of Cultivated Taxa was Highly Variable**

355 Due to the nestedness of this experiment (i.e. taxa observed during cultivation theoretically  
356 would be observed in sequencing), the stratification of taxa based on sampled orifice was  
357 corrected for hypothesis testing with permanova by defining orifice as a stratum in the *adonis2*  
358 function in the *vegan* package (47). The majority of the explained variation and significant  
359 differences in cultivated taxa were due to treatment of the inoculum or medium type ( $F= 2.44$ ,  $R^2$   
360  $= 0.12$ ,  $p = 0.001$ ), while base medium type alone explained only ~5% of the observed variation  
361 ( $F= 1.54$ ,  $R^2 = 0.05$ ,  $p = 0.002$ )(Figure 5). The interactions of base medium and treatment only  
362 explained ~6% of the variation ( $F= 1.52$ ,  $R^2= 0.06$ ,  $p= 0.208$ ). An analysis of variances  
363 (permdisp) was used to determine if any significance was driven by a dispersion effect rather  
364 than a location effect for orifice, base medium type, treatments, and medium+treatments. Mean  
365 distances to centroids did not differ significantly for orifice ( $F=0.69$ ,  $p=0.41$ ; Mouth 0.51;  
366 Rectum 0.53) or medium+treatment ( $F= 1.38$ ,  $p=0.20$ ; TSA=0.47, TSAcatalase=0.52,  
367 TSAstrep=0.51, TSAethanol=0.45, R2A=0.44, R2Aacatalase=0.47, R2Aethanol=0.45,  
368 Blood=0.45, Bloodethanol=0.50, Bloodstrep=0.53, ROXY=0.48, ROXYcatalase=0.49,



369 ROXYgh=0.52), meaning little inter-sample variation was detected between replicates. In  
370 contrast, the mean distances did differ for treatment (F=3.3, p=0.02; alpha-  
371 ketoglutarate+hemin=0.52, no treatment (base)=0.50, catalase=0.53, ethanol=0.49,  
372 streptomycin=0.56 ) and base medium type (F=4.4, p=0.01; Blood=0.56, R2A=0.50,  
373 ROXY=0.53, TSA=0.55 ). The significance in dispersion within the treatment and media could  
374 correspond to the significance in permanova results, where much of the variation explained in  
375 the permanova may be due to the intrinsic variability and stochasticity among replicates of the  
376 same inoculum.

377

## 378 **Discussion**

379 We used mouth and rectal samples from a roadkill mammal (raccoon, *Procyon lotor*) to  
380 (1) compare the diversity of cultured bacterial communities on multiple media types and/or  
381 treatments of the inoculum, (2) determine which media/treatments cultivated the highest richness  
382 of bacterial taxa, and (3) determine if any isolated organisms produced bioactive molecules  
383 against a drug resistant pathogen panel. The occurrence of antimicrobial resistance is increasing  
384 at a faster rate than new therapies are entering the market (52, 53). Since nearly two-thirds of our  
385 current antimicrobial drugs are linked to microorganisms (52, 54), one of our goals was to  
386 cultivate a diverse array of bacteria from a non-human mammalian microbiome and screen these  
387 isolates for the production of antimicrobial metabolites. Growing microbial populations in the  
388 laboratory that are representative of the overall microbial diversity within an inoculum continues  
389 to be a major limitation for the field of microbiology. Here, we sought to use a combination of  
390 selective medium types and treatments of the inocula that might enrich for certain groups present  
391 in the oral and gut microbiomes of a roadkill racoon. In order to capture a more comprehensive

392 sample of microbial diversity, we used high-throughput sequencing of 16S rRNA gene amplified  
393 libraries to characterize the original inocula and the cultivated populations that were washed  
394 from the surface of agar media.

395 We anticipated finding a significantly lower percentage of cultivable organisms relative  
396 to the molecular-based measures of diversity from each orifice, which we described as the  
397 cultivated percentage. We also anticipated that the identity of recovered taxa would be similar  
398 between media types and even orifices. The differences between organisms cultivated on  
399 different media, from different orifices was low. However, when observing the significance  
400 described in the permanova and permdisp, the percentage of explained variation was low. This  
401 suggested that the stoichiometry of diverse and variable inocula could play a large part in the  
402 outcome of this and any similar cultivation experiment. Based on the low percentage of  
403 explained variation, we also approached this data set from the perspective of the unobserved or  
404 residual variation, such that some of this discussion will aim to pose questions about what makes  
405 cultivation so difficult. Overall, we observed that cultivation yielded not just a fraction of what is  
406 detected in sequence data, but rather expanded the total diversity observed in the original sample.

407

#### 408 **Cultivation can be optimized at large scales**

409 Convergence of microbial communities occurred between the mouth and rectum for both  
410 the molecular samples and the cultivated communities. This was expected since as an animal  
411 undergoes decomposition, the microbial diversity decreases, especially in rectal communities  
412 (55), and becomes dominated by only certain taxa, namely Proteobacteria (56). In our samples,  
413 despite being a single time point roughly 8 hours after death, the mouth was dominated by  
414 Proteobacteria while the rectum samples contained mostly Firmicutes, Proteobacteria, and

415 Bacteroides (Figure S3). Overall, about 87% of the microbial families detected in the molecular  
416 controls were shared between the mouth and rectum. This increase in shared taxa was also  
417 expected, as the proportion of cultivable organisms was expected to be lower (57) and the  
418 differences in diversity would not be detected through the selection of cultivability. Because of  
419 the small proportion of molecularly characterized microorganisms that are routinely recovered in  
420 the laboratory, we employed multiple variations in cultivation, like medium type and inoculum  
421 treatments to “cast a wider net.”

422         Treatments selected for organisms that can withstand ethanol stress (e.g., spore-formers),  
423 or were streptomycin resistant. These had a greater effect on the cultivable diversity compared to  
424 changes in base medium alone, likely because the base media shared many of the same  
425 oxidizable substrates (see media recipes in methods section). It was logical to hypothesize that  
426 the inoculum exposed to selective treatments could have decreased cultivated richness compared  
427 to the same inoculum on an untreated medium of the same type, since the selective agent would  
428 inhibit the growth of a portion of the population. Instead, the cultivable richness and diversity  
429 varied for the same treatments on different base medium types and between orifices (Figure 1  
430 and Figure 5). This could be due to the treatments selecting for specific groups of taxa (i.e.  
431 antibiotics) or creating an environment where certain taxa were able to out-compete on non-  
432 selective medium (i.e. low nutrients, increased incubation and slow growers) (17). Specifically,  
433 medium amended with catalase or streptomycin and inocula treated with ethanol resulted in  
434 cultivated organisms not identified on other plates, or even the molecular controls in some cases  
435 (Figure 4). One possible explanation would be that this was due to the inherit stochasticity  
436 associated with cultivation (discussed below). Despite the variability, we were able to cultivate  
437 roughly 57% of the species richness observed with molecular approaches. Previous studies

438 measuring cultivation success with high-throughput sequencing have reported similar levels of  
439 cultivable richness from the skin of toads (~60%) (26) and rumen fluid (23%) (29). Medina et al.  
440 (2017) reported greater variation in cultivability between inocula (different animals). Our data  
441 showed that more variability in cultivated taxa was observed between selective additions to the  
442 medium or treatments of the inocula (Figure 5), and not the inocula (different orifices) (Figure  
443 3). Similar to Zehavi et al, (2018), different medium types and treatments increased the  
444 cultivable proportion of the original sample.

445

#### 446 **Bioactivity and phylogenetic diversity of isolates**

447 The research reported here was based on previous success of using roadkill mammals as a  
448 source of antimicrobial-producing microorganisms (33). Our intent was to quantify and broaden  
449 the diversity of cultivated bacteria by the addition of various media and treatments. This affect  
450 was measured by using plate-wash PCR and SSU rRNA gene sequencing. Simultaneously,  
451 colonies were also picked for isolation from replicate plates (n = 3), identified through SSU  
452 rRNA sequencing, and screened for antimicrobial production. Overall, 7 of the 238 recovered  
453 isolates showed bioactivity against the antibiotic-resistant pathogen panel, resulting in a ~3% hit  
454 rate. A total of five bioactive isolates were successfully sequenced and met our quality control  
455 standards described in the methods. Three belonged to the phylum Proteobacteria (class  
456 Gammaproteobacteria) and two belonged to the phylum Firmicutes. Two isolates were identified  
457 as a *Bacillus* sp. and a *Pseudomonas* sp., both genera known to contain species that produce  
458 bioactive compounds (33, 58-61). Interestingly, the isolates identified as an *Enterococcus* sp.  
459 and *Klebsiella* sp. showed inhibitory activity to a member of its own genus, *Enterococcus*  
460 *faecium* and *Klebsiella pneumoniae*, respectively. This finding was consistent with the hypothesis

461 that closely-related organisms often have a negative effect on each other due to resource overlap  
462 (62), which has been demonstrated for these genera (63). In addition, some populations could be  
463 making antimicrobials, like bacteriocins, that effect close relatives (64).

464

### 465 **Cultivation Yields Complex Data**

466 The cultivation and isolation of many organisms at once can be incredibly laborious. New  
467 technologies and approaches can help increase throughput, which is necessary to overcome the  
468 re-isolation of abundant, common, and easy to cultivate organisms. However, it is still important  
469 to be able to assess the efficacy of any cultivation effort. Unfortunately, we uncovered an  
470 intrinsic property of cultivation that is not readily realized unless assessed at a large scale,  
471 variability. Here, we did not detect the same cells (e.g., colonies measured in PWPCR)  
472 consistently growing on replicate plates (Figure S4).

473 Neither differences in cultivation strategy nor orifice sampled could explain the majority  
474 of the observed variation in community structure (Figure 5). We can attribute unexplained  
475 variance (i.e. residuals) observed between communities (i.e. beta diversity) to stochastic effects  
476 of cultivation, but that is not fundamentally measurable in this case. We can speculate that  
477 randomness would play a role in cultivation as samples are diluted (27, 29) or the spatial  
478 heterogeneity of the inoculum is altered, as demonstrated on a much larger scale using leaf litter  
479 (65). In these instances, we could expect different inocula resulting in different assemblages of  
480 cultivated organisms. We also know that microorganisms immobilized on an agar surface are  
481 still able to interact through motility or diffusion of metabolites, making certain competitive  
482 adaptations more advantageous (64). In this experiment, the agar media allowed physical  
483 separation of individual cells in the inocula and constrained microbial populations to form

484 colonies, potentially forcing interactions with neighboring colonies that could result in  
485 competition and inhibition of growth through secondary metabolite production (64). The  
486 randomness of which populations are in close proximity to one another could play a role in  
487 which members will thrive from the same inoculum source, affecting the outcome of which taxa  
488 are cultivated (66).

489         Cultivation on agar plates warrants special consideration when discussing diversity. The  
490 relative distribution of populations on an agar surface affects their prevalence and the overall  
491 composition of the cultivated community. Further, the physiology and colony morphology of  
492 each population dictates their prevalence and that of the surrounding populations on an agar  
493 surface. Colony size, especially surface area, is impacted by traits such as growth rate, surface  
494 motility (i.e., gliding motility, swarming), presence of inhibitory metabolites, and the availability  
495 of resources. These differences in biomass distribution were important when deciding how to  
496 measure diversity, a critical metric for assessing cultivation on an agar surface. Unlike liquid  
497 cultures, varying biomass (i.e. colony size) from different taxa that might produce an equal  
498 number of colonies can over-estimate the relative abundance of that taxon, studies relying on  
499 relative abundance to characterize diversity should consider this (26, 30). If a population (A) has  
500 more proficient growth and forms a larger colony than population (B), DNA extracted from each  
501 population would indicate that taxon A was more abundant in the original inoculum, incorrectly  
502 representing the evenness of the original inoculum. This is especially true when relative  
503 abundance is calculated based on equimolar DNA concentration during library prep. To mitigate  
504 any biased evenness, species richness and Jaccard distances was used to measure alpha and beta  
505 diversity, respectively.

506         In this data set, about half of the ASVs detected after cultivation were not detected in the

507 molecular controls. This same phenomenon was observed by Zehavi et al. 2018 when cultivated  
508 rumen OTUs outnumbered the OTUs detected in the original rumen sample and its dilutions  
509 (1,012 out of 1,698) (29). This discrepancy may speak to the power of cultivation relative to the  
510 power of direct molecular analyses in describing the diversity of a community. However, both of  
511 these approaches come with their own caveats. Cultivation makes assumptions about an  
512 organism's ability to grow in the laboratory, while sequencing is dependent on methodology,  
513 sequencing chemistry and sampling depth. In this study, rarefaction curves indicated that  
514 sequencing efforts were sufficient (Figure S5). One potential explanation for the large proportion  
515 of ASVs not detected in the controls could be that in combination with the different media and  
516 treatments, we were able to give some of the less abundant microorganisms a growth advantage.  
517 For example, two families, Wohlfarhtimonodaceae and Metaschinikowiceae, were more  
518 associated with the addition of streptomycin to media (Table 1), and not detected in the  
519 molecular controls (Figure 4). Streptomycin may have selected against the more abundant or  
520 more competitive organisms, allowing taxa from these families to grow.

521

522 Cultivation is critical to answer broad challenges of microbial ecology like deciphering  
523 microbial metabolisms or specific challenges like obtaining new isolates for antibiotic discovery.  
524 The study of pure cultures remains the best approach to comprehensively describe an organism's  
525 physiological and metabolic properties, and efforts to optimize cultivation strategy have proven  
526 successful (13, 14, 16, 18, 21, 23, 28, 67-69). Our data adds to previous studies (26, 29) that also  
527 sought to assess how medium type and treatment could increase cultivated diversity, but adds the  
528 goal of "casting a wider net" to increase the diversity of bioactive isolates. We were able to add  
529 to our library of bioactive isolates and show that microbiomes from roadkill mammals are a

530 useful source of bioactivity, as observed in Motley et al 2017. Lastly, we showed that through a  
531 thoughtful cultivation approach driven by bulk molecular analysis of cultivated taxa, we could  
532 cultivate a larger proportion of the diversity within an inoculum and even taxa not detected in the  
533 molecular controls. This work adds to the growing assessment of cultivation strategies using  
534 newer tools, like high-throughput sequencing, and shows how these methods can be applied to  
535 drug discovery efforts. Cultivation is influenced by many factors, and this work highlights some  
536 of those intricacies, like variability and stochasticity. Cultivation is complex and challenging but  
537 cultivating in combination with molecular tools can expand the observed diversity of an  
538 environment and its community.

539

#### 540 **Acknowledgments**

541 The authors thank Dr. H. Nunn and the team of Mammalian Microbiome undergraduate  
542 researchers (A. Byrd, J. Dewberry, B. Hansen, C. Hauger, J. Jacobs) for sample processing  
543 during cultivation. The authors also thank Dr. A. K. Dunn for helpful comments during the  
544 writing process. The isolates used for the pathogen panel were kindly provided by Dr. Robert  
545 Cichewicz, Institute for Natural Products and Research Technologies (INPART), University of  
546 Oklahoma.

547

548

549

550

551

552



553

554

## 555 **Tables and Figures**

556 Figure 1: Alpha diversity of the mouth and rectum. For the controls, richness, measured using  
557 ASVs, was higher in the rectum than the mouth. For cultivated communities, richness varied  
558 based on medium type and treatment. Points represent each medium or treatment type, indicated  
559 by color (n=3). Molecular 16S/18S refers to the directly sequenced inoculum sample (n=3).

560

561 Figure 2: Distribution of ASVs between cultivation and molecular controls. The majority of  
562 ASVs detected in the original inocula were shared between the mouth and rectum, while  
563 approximately half of all ASVs detected through cultivation were not detected in the directly  
564 sequenced samples.

565

566 Figure 3: Beta diversity measured in Jaccard distance and NMDS ordination. Differences in  
567 microbial community structure were driven by orifice and treatment, specifically ethanol and  
568 streptomycin. Shape corresponds to orifice sampled, while color differentiates between  
569 treatments of the medium or inoculum.

570

571 Figure 4: Heatmaps describing presence absence of taxonomic families observed in the (a)  
572 mouth and (b) rectum. Purple indicates that a family was observed while grey indicates that a  
573 family was absent. The dendrograms highlight clusters of families observed during cultivation.

574

575 Figure 5: Percent of variation described by permanova models based on (a) media and treatment

576 with orifice as a stratum, (b) orifice and treatment, and (c) pairwise comparisons of treatments on  
 577 media types. Largely, the differences in community structure during cultivation could not be  
 578 explained by media, orifice, or treatment alone. In all graphs, residual variation (in grey), is the  
 579 proportion of variance not explained by the model.

580

**Table 1. Taxonomic associations with media type using Indicator Species Analysis**

| Grouping Factor                                     | Condition                         | Indicator ASV Family  | Index Value | p value |
|-----------------------------------------------------|-----------------------------------|-----------------------|-------------|---------|
| <b>Orifice</b>                                      | Mouth                             | Aeromonadaceae        | 0.483       | 0.007   |
| <b>Media Type</b>                                   | ROXY                              | Aeromonadaceae        | 0.589       | 0.001   |
|                                                     | Blood + TSA + R2A                 | Cladosporiaceae       | 0.604       | 0.026   |
| <b>Treatment</b>                                    | Ethanol                           | Staphylococcaceae     | 0.562       | 0.014   |
|                                                     |                                   | Paenibacillaceae      | 0.408       | 0.041   |
|                                                     | Streptomycin                      | Wohlfahrtiimonadaceae | 0.408       | 0.034   |
|                                                     |                                   | Metschnikowiaceae     | 0.408       | 0.030   |
|                                                     | Ethanol + Streptomycin            | Peptostreptococcaceae | 0.669       | 0.003   |
|                                                     | Catalase + Ethanol + Streptomycin | Aspergillaceae        | 0.692       | 0.004   |
|                                                     |                                   | Cladosporiaceae       | 0.633       | 0.006   |
| Catalase + Ethanol + Streptomycin +<br>No Treatment | Debaryomycetaceae                 | 0.899                 | 0.002       |         |
|                                                     | Clostridiaceae 1                  | 0.860                 | 0.006       |         |

581

**Table 2. Cultivated bioactive isolates**

| Isolate        | SILVA Taxonomy          | Orifice | Medium | Activity Against             |
|----------------|-------------------------|---------|--------|------------------------------|
| RC2RCR2A30-212 | <i>Bacillus</i> sp.     | Rectum  | R2A    | <i>Klebsiella pneumoniae</i> |
| RC2MOR2A30-238 | <i>Pseudomonas</i> sp.  | Mouth   | R2A    | <i>Candida albicans</i>      |
| RC2MORGH30-018 | Enterobacteriaceae      | Mouth   | ROXYgh | <i>Enterococcus faecium</i>  |
| RC2MOTSA30-050 | <i>Enterococcus</i> sp. | Mouth   | TSA    | <i>Enterococcus faecium</i>  |
| RC2MOTSA30-142 | <i>Klebsiella</i> sp.   | Mouth   | TSA    | <i>Klebsiella pneumoniae</i> |

582

583

584

585

586 **Supplementary Material:**

587 Figure S1: Bioassay plate showing three isolates generating a zone of inhibition within pathogen  
588 overlay.

589

590 Figure S2: Pie chart of 117 identified isolates at the genus level.

591

**Table S1. A quasi-factorial approach using targeted media and treatments for gut microorganisms.**

| Treatment/ Selection agents   | Media   |      |          |            |
|-------------------------------|---------|------|----------|------------|
|                               | 0.1 TSA | ROXY | 0.25 R2A | Blood Agar |
| None                          | X       | X    | X        | X          |
| Catalase                      | X       | X    | X        |            |
| Hemin and alpha-ketoglutarate |         | X    |          |            |
| 70% ethanol                   | X       |      | X        | X          |
| Streptomycin                  | X       |      | X        | X          |

592

593

594 Figure S3: Phylum-level characterization of molecular controls, triplicates shown for mouth  
595 (RC2M) and rectum (RC2R).

596

597 Figure S4: Bar chart describing the variability of consistent recovery of ASVs, data subset. Y  
598 axis indicates how many replicates of TSA plates in which the top 25 ASV were observed. Color  
599 corresponds to orifice.

600

601 Figure S5: Rarefaction curves showing plateaued sequencing depth of (a) cultivation samples  
602 and (b) molecular controls.

603

604

605

606 References:

- 607  
608 1. Sogin ML, Morrison HG, Huber JA, Welch DM, Huse SM, Neal PR, Arrieta JM, Herndl  
609 GJ. 2006. Microbial diversity in the deep sea and the underexplored “rare biosphere”.  
610 *Proceedings of the National Academy of Sciences* 103:12115–12120.
- 611 2. Donia MS, Cimermancic P, Schulze CJ, Brown LCW, Martin J, Mitreva M, Clardy J,  
612 Linington RG, Fischbach MA. 2014. A Systematic Analysis of Biosynthetic Gene  
613 Clusters in the Human Microbiome Reveals a Common Family of Antibiotics. *Cell*  
614 158:1402–1414.
- 615 3. Tortorella E, Tedesco P, Palma Esposito F, January G, Fani R, Jaspars M, de Pascale D.  
616 2018. Antibiotics from Deep-Sea Microorganisms: Current Discoveries and Perspectives.  
617 *Marine Drugs* 16:355–16.
- 618 4. Halfvarson J, Brislawn CJ, Lamendella R, Vázquez-Baeza Y, Walters WA, Bramer LM,  
619 D’Amato M, Bonfiglio F, McDonald D, González A, McClure EE, Dunklebarger MF,  
620 Knight R, Jansson JK. 2017. Dynamics of the human gut microbiome in inflammatory  
621 bowel disease. *Nature Microbiology* 2:1–7.
- 622 5. Arora-Williams K, Olesen SW, Scandella BP, Delwiche K, Spencer SJ, Myers EM,  
623 Abraham S, Sooklal A, Preheim SP. 2018. Dynamics of microbial populations mediating  
624 biogeochemical cycling in a freshwater lake. *Microbiome* 6:165–16.
- 625 6. Gilbert JA, Quinn RA, Debelius J, Xu ZZ, Morton J, Garg N, Jansson JK, Dorrestein PC,  
626 Knight R. 2016. Microbiome-wide association studies link dynamic microbial consortia to  
627 disease. *Nature* 535:94–103.
- 628 7. Singh BK, Bardgett RD, Smith P, Reay DS. 2010. Microorganisms and climate change:  
629 terrestrial feedbacks and mitigation options. *Nature Reviews* 8:779–790.
- 630 8. Staley JT, Konopka A. 1985. Measurement of In Situ Activities of Nonphotosynthetic  
631 Microorganisms in Aquatic and Terrestrial Habitats. *Annu Rev Microbiol* 39:321–346.
- 632 9. Lloyd KG, Steen AD, Ladau J, Yin J, Crosby L. 2018. Phylogenetically Novel Uncultured  
633 Microbial Cells Dominate Earth Microbiomes. *mSystems* 3:431–12.
- 634 10. Eloie-Fadrosh EA, Ivanova NN, Woyke T, Kyrpides NC. 2016. Metagenomics uncovers  
635 gaps in amplicon-based detection of microbial diversity. *Nature Microbiology* 1:15032–4.
- 636 11. Schloss PD, Girard RA, Martin T, Edwards J, Thrash JC. 2016. Status of the Archaeal and  
637 Bacterial Census: an Update. *mBio* 7:995–10.
- 638 12. Nichols D, Cahoon N, Trakhtenberg EM, Pham L, Mehta A, Belanger A, Kanigan T,  
639 Lewis K, Epstein SS. 2010. Use of ichip for high-throughput in situ cultivation of  
640 “uncultivable” microbial species. *Appl Environ Microbiol* 76:2445–2450.

- 641 13. Stevenson BS, Eichorst SA, Wertz JT, Schmidt TM, Breznak JA. 2004. New strategies for  
642 cultivation and detection of previously uncultured microbes. *Appl Environ Microbiol*  
643 70:4748–4755.
- 644 14. Connon SA, Giovannoni SJ. 2002. High-Throughput Methods for Culturing  
645 Microorganisms in Very-Low-Nutrient Media Yield Diverse New Marine Isolates. *Appl*  
646 *Environ Microbiol* 68:3878–3885.
- 647 15. Reasoner DJ, Geldreich EE. 1985. A New Medium for the Enumeration and Subculture of  
648 Bacteria from Potable Water. *Appl Environ Microbiol* 49:1–7.
- 649 16. Bartelme RP, Custer JM, Dupont CL, Espinoza JL, Torralba M, Khalili B, Carini P. 2020.  
650 Influence of Substrate Concentration on the Culturability of Heterotrophic Soil Microbes  
651 Isolated by High-Throughput Dilution-to-Extinction Cultivation. *mSphere* 5:489–15.
- 652 17. Davis KER, Joseph SJ, Janssen PH. 2005. Effects of Growth Medium, Inoculum Size, and  
653 Incubation Time on Culturability and Isolation of Soil Bacteria. *Appl Environ Microbiol*  
654 71:826–834.
- 655 18. Henson MW, Pitre DM, Weckhorst JL, Lanclos VC, Webber AT, Thrash JC. 2016.  
656 Artificial Seawater Media Facilitate Cultivating Members of the Microbial Majority From  
657 the Gulf of Mexico. *mSphere* 1:e00028–16.
- 658 19. Kawasaki K, Kamagata Y. 2017. Phosphate-Catalyzed Hydrogen Peroxide Formation  
659 from Agar, Gellan, and  $\kappa$ -Carrageenan and Recovery of Microbial Cultivability via  
660 Catalase and Pyruvate. *Appl Environ Microbiol* 83:e01366–17.
- 661 20. Kim S, Kang I, Seo J-H, Cho J-C. 2019. Culturing the ubiquitous freshwater  
662 actinobacterial acI lineage by supplying a biochemical “helper” catalase. *The ISME*  
663 *Journal* 13:2252–2263.
- 664 21. Oberhardt MA, Zarecki R, Gronow S, Lang E, Klenk H-P, Gophna U, Ruppin E. 2015.  
665 Harnessing the landscape of microbial culture media to predict new organism-media  
666 pairings. *Nature Communications* 6:1–14.
- 667 22. Kopke B, Wilms R, Engelen B, Cypionka H, Sass H. 2005. Microbial Diversity in Coastal  
668 Subsurface Sediments: a Cultivation Approach Using Various Electron Acceptors and  
669 Substrate Gradients. *Appl Environ Microbiol* 71:7819–7830.
- 670 23. Browne HP, Forster SC, Anonye BO, Kumar N, Neville BA, Stares MD, Goulding D,  
671 Lawley TD. 2016. Culturing of “unculturable” human microbiota reveals novel taxa and  
672 extensive sporulation. *Nature* 533:543–546.
- 673 24. La Scola B, Khelaifia S, Lagier JC, Raoult D. 2014. Aerobic culture of anaerobic bacteria  
674 using antioxidants: a preliminary report. *Eur J Clin Microbiol Infect Dis* 33:1781–1783.

- 675 25. Dione N, Khelaifia S, La Scola B, Lagier JC, Raoult D. 2016. A quasi-universal medium  
676 to break the aerobic/anaerobic bacterial culture dichotomy in clinical microbiology.  
677 *Clinical Microbiology and Infection* 22:53–58.
- 678 26. Medina D, Walke JB, Gajewski Z, Becker MH, Swartwout MC, Belden LK. 2017. Culture  
679 Media and Individual Hosts Affect the Recovery of Culturable Bacterial Diversity from  
680 Amphibian Skin. *Front Microbiol* 8:32–15.
- 681 27. Justice NB, Szczesnak A, Hazen TC, Arkin AP. 2017. Environmental Selection, Dispersal,  
682 and Organism Interactions Shape Community Assembly in High-Throughput Enrichment  
683 Culturing. *Appl Environ Microbiol* 83:e01253–17–16.
- 684 28. Yang S-J, Kang I, Cho J-C. 2015. Expansion of Cultured Bacterial Diversity by Large-  
685 Scale Dilution-to-Extinction Culturing from a Single Seawater Sample. *Microb Ecol*  
686 71:29–43.
- 687 29. Zehavi T, Probst M, Mizrahi I. 2018. Insights Into Culturomics of the Rumen  
688 Microbiome. *Front Microbiol* 9:D46–10.
- 689 30. Cummings LA, Hoogestraat DR, Rassouljian-Barrett SL, Rosenthal CA, Salipante SJ,  
690 Cookson BT, Hoffman NG. 2020. Comprehensive evaluation of complex polymicrobial  
691 specimens using next generation sequencing and standard microbiological culture. *Sci*  
692 *Rep* 10:1–12.
- 693 31. Hoffmann T, Krug D, Bozkurt N, Duddela S, Jansen R, Garcia R, Gerth K, Steinmetz H,  
694 Muller R. 2018. Correlating chemical diversity with taxonomic distance for discovery of  
695 natural products in myxobacteria. *Nature Communications* 9:1–10.
- 696 32. Helfrich EJM, Vogel CM, Ueoka R, Schafer M, Ryffel F, Muller DB, Probst S, Kreuzer  
697 M, Piel J, Vorholt JA. 2018. Bipartite interactions, antibiotic production and biosynthetic  
698 potential of the *Arabidopsis* leaf microbiome. *Nature Microbiology* 3:909–919.
- 699 33. Motley JL, Stamps BW, Mitchell CA, Thompson AT, Cross J, You J, Powell DR,  
700 Stevenson BS, Cichewicz RH. 2017. Opportunistic Sampling of Roadkill as an Entry  
701 Point to Accessing Natural Products Assembled by Bacteria Associated with Non-  
702 anthropoidal Mammalian Microbiomes. *J Nat Prod* 80:598–608.
- 703 34. van der Meij A, Worsley SF, Hutchings MI, van Wezel GP. 2017. Chemical ecology of  
704 antibiotic production by actinomycetes. *FEMS Microbiology Reviews* 41:392–416.
- 705 35. Stierle AA, Stierle DB, Kelley K. 2006. Berkelic Acid, A Novel Spiroketal with Selective  
706 Anticancer Activity from an Acid Mine Waste Fungal Extremophile. *Journal of Organic*  
707 *Chemistry* 71:5357–5360.
- 708 36. Ding Z-G, Li M-G, Zhao J-Y, Ren J, Huang R, Xie M-J, Cui X-L, Zhu H-J, Wen M-L.  
709 2010. Naphthospironone A: An Unprecedented and Highly Functionalized Polycyclic  
710 Metabolite from an Alkaline Mine Waste Extremophile. *Chem Eur J* 16:3902–3905.

- 711 37. Rangseekaew P, Pathom-aree W. 2019. Cave Actinobacteria as Producers of Bioactive  
712 Metabolites. *Front Microbiol* 10:381–11.
- 713 38. Smanski MJ, Schlatter DC, Kinkel LL. 2015. Leveraging ecological theory to guide  
714 natural product discovery. *Journal of Industrial Microbiology & Biotechnology* 43:115–  
715 128.
- 716 39. Schatz A, Bugle E, Waksman SA. 1944. Streptomycin, a substance exhibiting antibiotic  
717 activity against Gram-positive and Gram-negative bacteria. *Experimental Biology and*  
718 *Medicine* 55:66–69.
- 719 40. Parada AE, Needham DM, Fuhrman JA. 2015. Every base matters: assessing small  
720 subunit rRNA primers for marine microbiomes with mock communities, time series and  
721 global field samples. *Environ Microbiol* 18:1403–1414.
- 722 41. Kraus EA, Beeler SR, Mors RA, Floyd JG, *GeoBiology* 2016, Stamps BW, Nunn HS,  
723 Stevenson BS, Johnson HA, Shapiro RS, Loyd SJ, Spear JR, Corsetti FA. 2018.  
724 Microscale Biosignatures and Abiotic Mineral Authigenesis in Little Hot Creek,  
725 California. *Front Microbiol* 9:544–13.
- 726 42. Caporaso JG, Kuczynski J, Stombaugh J, Bittinger K, Bushman FD, Costello EK, Fierer  
727 N, Peña AG, Goodrich JK, Gordon JI, Huttley GA, Kelley ST, Knights D, Koenig JE, Ley  
728 RE, Lozupone CA, McDonald D, Muegge BD, Pirrung M, Reeder J, Sevinsky JR,  
729 Turnbaugh PJ, Walters WA, Widmann J, Yatsunenko T, Zaneveld J, Knight R. 2010.  
730 QIIME allows analysis of high-throughput community sequencing data. *Nat Methods*  
731 7:335–336.
- 732 43. Callahan BJ, McMurdie PJ, Rosen MJ, Han AW, Johnson AJA, Holmes SP. 2016.  
733 DADA2: High-resolution sample inference from Illumina amplicon data. *Nat Methods*  
734 13:581–583.
- 735 44. Quast C, Pruesse E, Yilmaz P, Gerken J, Schweer T, Yarza P, Peplies J, Glöckner FO.  
736 2013. The SILVA ribosomal RNA gene database project: improved data processing and  
737 web-based tools. *Nucleic Acids Research* 41:D590–6.
- 738 45. Yilmaz, P, Parfrey, LW, Yarza, P, Gerken, J, Pruesse, E, Quast, C, Schweer, T, Peplies, J,  
739 Ludwig, W, Glöckner, FO. 2014. *Nucleic Acids Research* 42:D643–8.
- 740 46. McMurdie PJ, Holmes S. 2013. phyloseq: an R package for reproducible interactive  
741 analysis and graphics of microbiome census data. *PLoS ONE* 8:e61217.
- 742 47. Dixon P. 2003. VEGAN, a package of R functions for community ecology. *Journal of*  
743 *Vegetation Science* 14:927–930.
- 744 48. De Cáceres M, Legendre P. 2009. Associations between species and groups of sites:  
745 indices and statistical inference. *Ecology* 90:3566–3574.

- 746 49. De Cáceres M, Sol D, Lapiedra O, Legendre P. 2011. A framework for estimating niche  
747 metrics using the resemblance between qualitative resources. *Oikos* 120:1341–1350.
- 748 50. Robinson JT, Thorvaldsdóttir H, Winckler W, Guttman M, Lander ES, Getz G, Mesirov  
749 JP. 2011. Integrative genomics viewer. *Nature Biotechnology* 29:24–26.
- 750 51. Kumar S, Stecher G, Li M, Knyaz C, Tamura K. 2018. MEGA X: Molecular Evolutionary  
751 Genetics Analysis across Computing Platforms. *Molecular Biology and Evolution*  
752 35:1547–1549.
- 753 52. Newman DJ, Cragg GM. 2016. Natural Products as Sources of New Drugs from 1981 to  
754 2014. *J Nat Prod* 79:629–661.
- 755 53. 2019. Antibiotic Resistance and Threats in the United States 2019. Center for Disease  
756 Control (CDC).
- 757 54. Clardy J, Fischbach MA, Walsh CT. 2006. New antibiotics from bacterial natural  
758 products. *Nat Biotech* 24:1541–1550.
- 759 55. Guo J, Fu X, Liao H, Hu Z, Long L, Yan W, Ding Y, Zha L, Guo Y, Yan J, Chang Y, Cai  
760 J. 2016. Potential use of bacterial community succession for estimating post-mortem  
761 interval as revealed by high-throughput sequencing. *Sci Rep* 6:1–11.
- 762 56. Metcalf JL, Wegener Parfrey L, González A, Lauber CL, Knights D, Ackermann G,  
763 Humphrey GC, Gebert MJ, Van Treuren W, Berg-Lyons D, Keepers K, Guo Y, Bullard J,  
764 Fierer N, Carter DO, Knight R. 2013. A microbial clock provides an accurate estimate of  
765 the postmortem interval in a mouse model system. *eLife* 2:403–19.
- 766 57. Jensen, V. 1968. The plate count technique. In TRG Gray & D Parkinson (Eds.), *The*  
767 *ecology of soil bacteria* (pp. 158–170). Liverpool University Press.
- 768 58. Hamdache A, Lamarti A, Aleu J, Collado IG. 2011. Non-peptide Metabolites from the  
769 Genus *Bacillus*. *J Nat Prod* 74:893–899.
- 770 59. Sumi CD, Yang BW, Yeo I-C, Hahn YT. 2015. Antimicrobial peptides of the genus  
771 *Bacillus*: a new era for antibiotics. *Can J Microbiol* 61:93–103.
- 772 60. Raaijmakers JM, Weller DM, Thomashow LS. 1997. Frequency of Antibiotic-Producing  
773 *Pseudomonas* spp. in Natural Environments. *Appl Environ Microbiol* 63:881–887.
- 774 61. Fuller AT, Mellows G, Woolford M, Banks GT, Barrow KD, Chain EB. 1971.  
775 Pseudomonic Acid: an Antibiotic produced by *Pseudomonas fluorescens*. *Nature*  
776 234:416–417.
- 777 62. Hibbing ME, Fuqua C, Parsek MR, Peterson SB. 2009. Bacterial competition: surviving  
778 and thriving in the microbial jungle. *Nature Reviews Microbiology* 8:15–25.



- 779 63. de Vos MGJ, Zagorski M, McNally A, Bollenbach T. 2017. Interaction networks,  
780 ecological stability, and collective antibiotic tolerance in polymicrobial infections.  
781 Proceedings of the National Academy of Sciences 114:10666–10671.
- 782 64. Chao L, Levin BR. 1981. Structured habitats and the evolution of anticompetitor toxins in  
783 bacteria. Proceedings of the National Academy of Sciences 78:6324–6328.
- 784 65. Albright MBN, Chase AB, Martiny JBH. 2019. Experimental Evidence that Stochasticity  
785 Contributes to Bacterial Composition and Functioning in a Decomposer Community.  
786 mBio 10:247–13.
- 787 66. Traxler MF, Watrous JD, Alexandrov T, Dorrestein PC, Kolter R. 2013. Interspecies  
788 Interactions Stimulate Diversification of the *Streptomyces coelicolor* Secreted  
789 Metabolome. mBio 4:e00459–13.
- 790 67. Marmann A, Aly A, Lin W, Wang B, Proksch P. 2014. Co-Cultivation—A Powerful  
791 Emerging Tool for Enhancing the Chemical Diversity of Microorganisms. Marine Drugs  
792 12:1043–1065.
- 793 68. Lagier J-C, Hugon P, Khelaifia S, Fournier P-E, La Scola B, Raoult D. 2015. The rebirth  
794 of culture in microbiology through the example of culturomics to study human gut  
795 microbiota. Clin Microbiol Rev 28:237–264.
- 796 69. Berdy B, Spoering AL, Ling LL, Epstein SS. 2017. In situ cultivation of previously  
797 uncultivable microorganisms using the ichip. Nat Protoc 12:2232–2242.
- 798

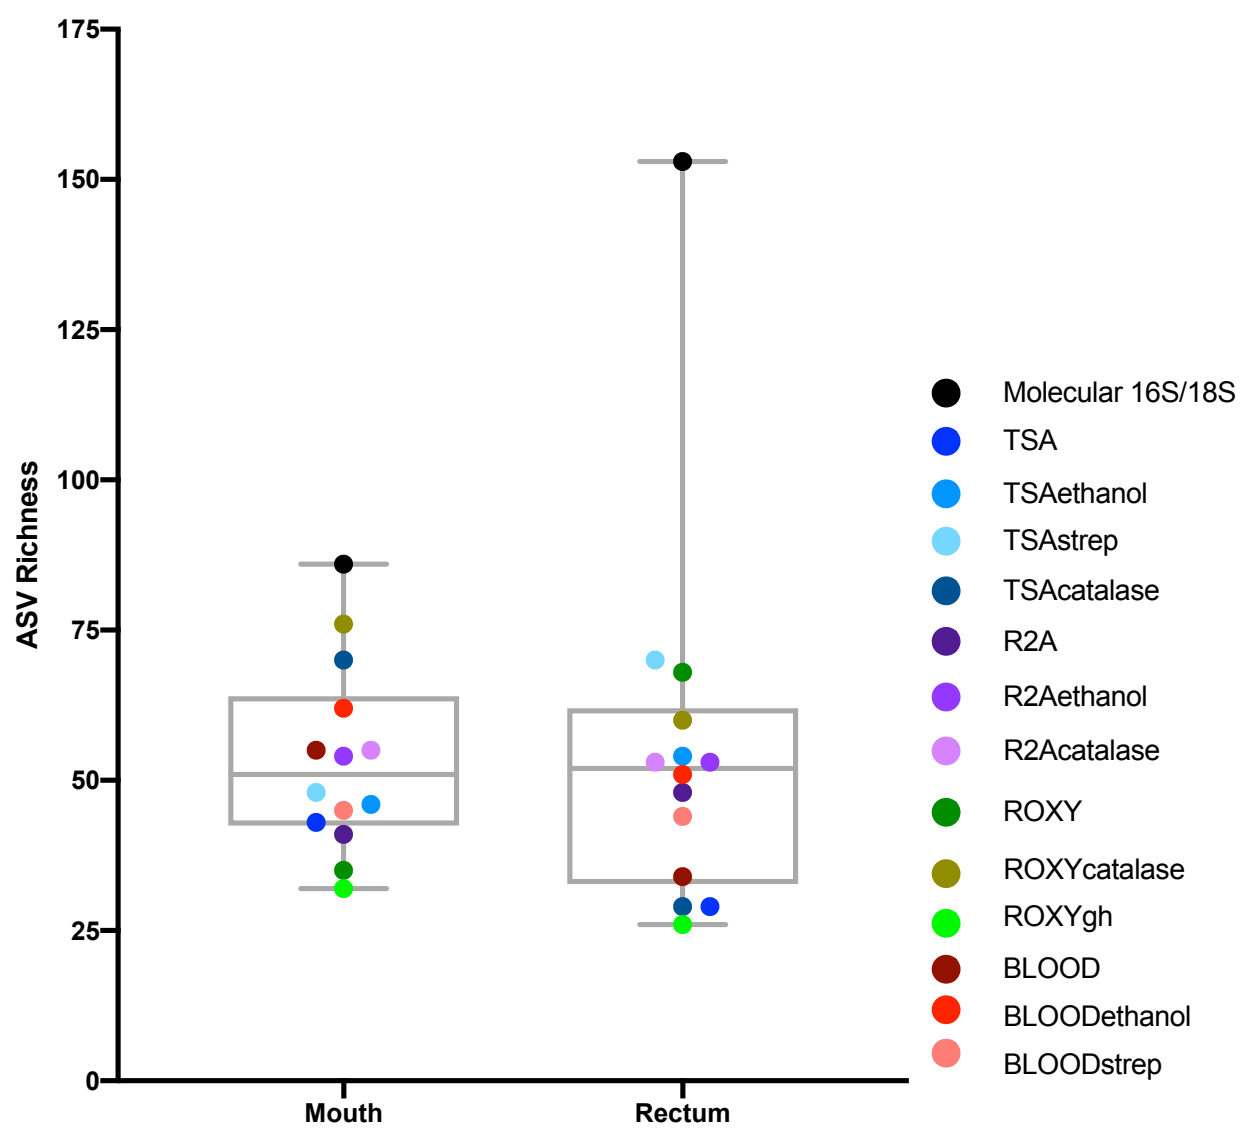

Mouth: Cultivation

Rectum: Molecular Swab

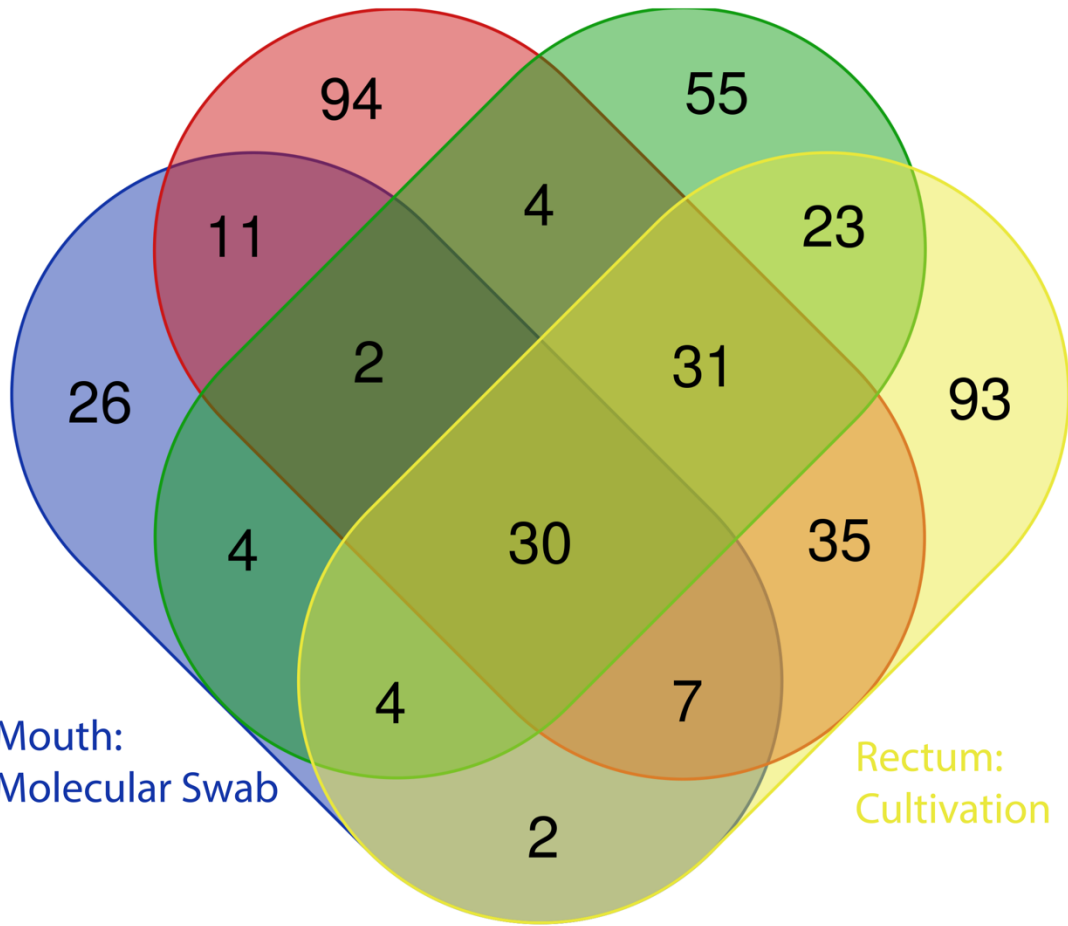

Mouth:  
Molecular Swab

Rectum:  
Cultivation

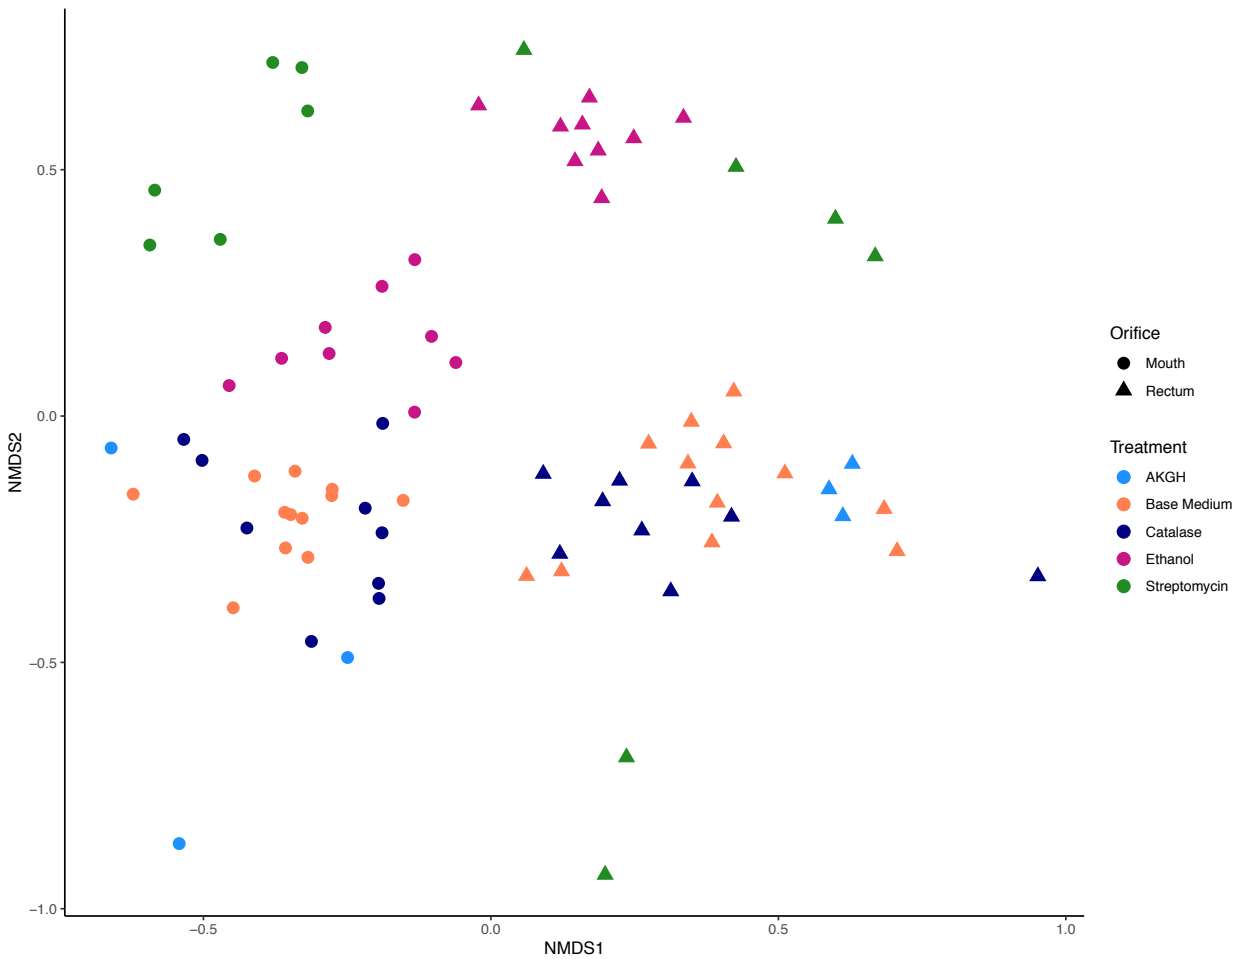

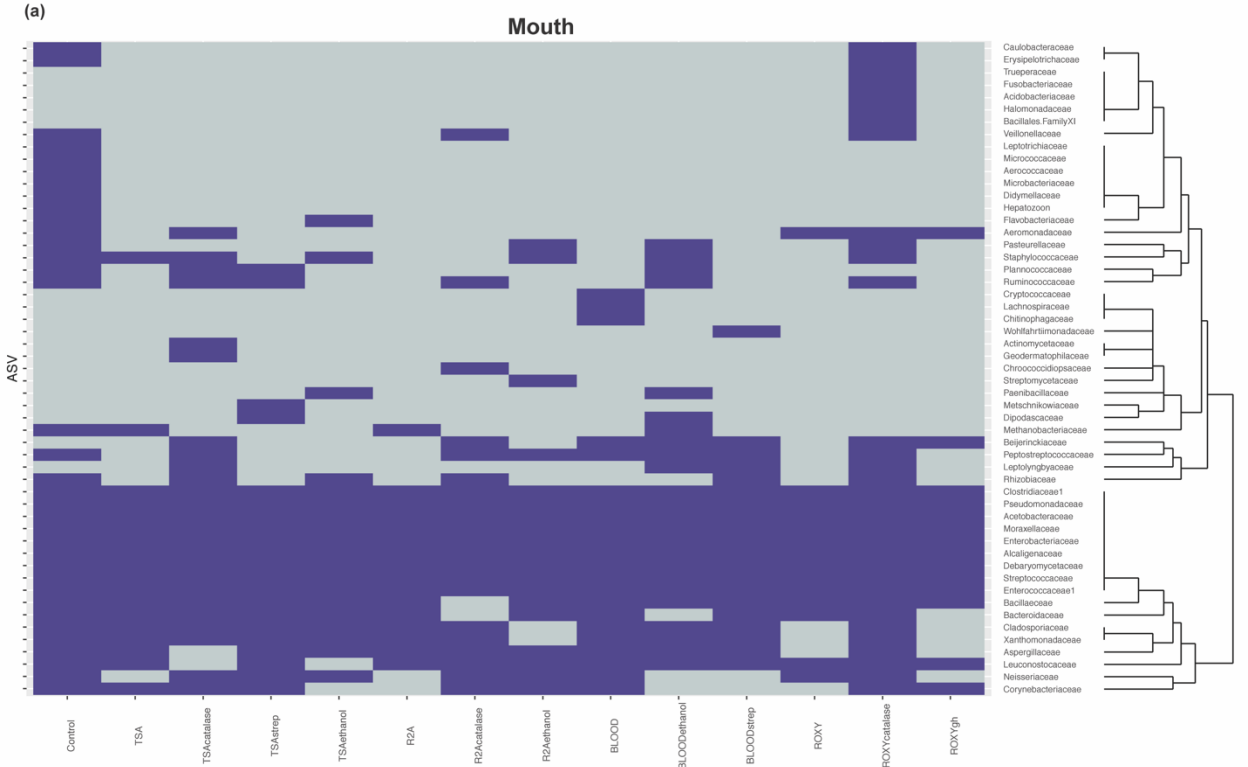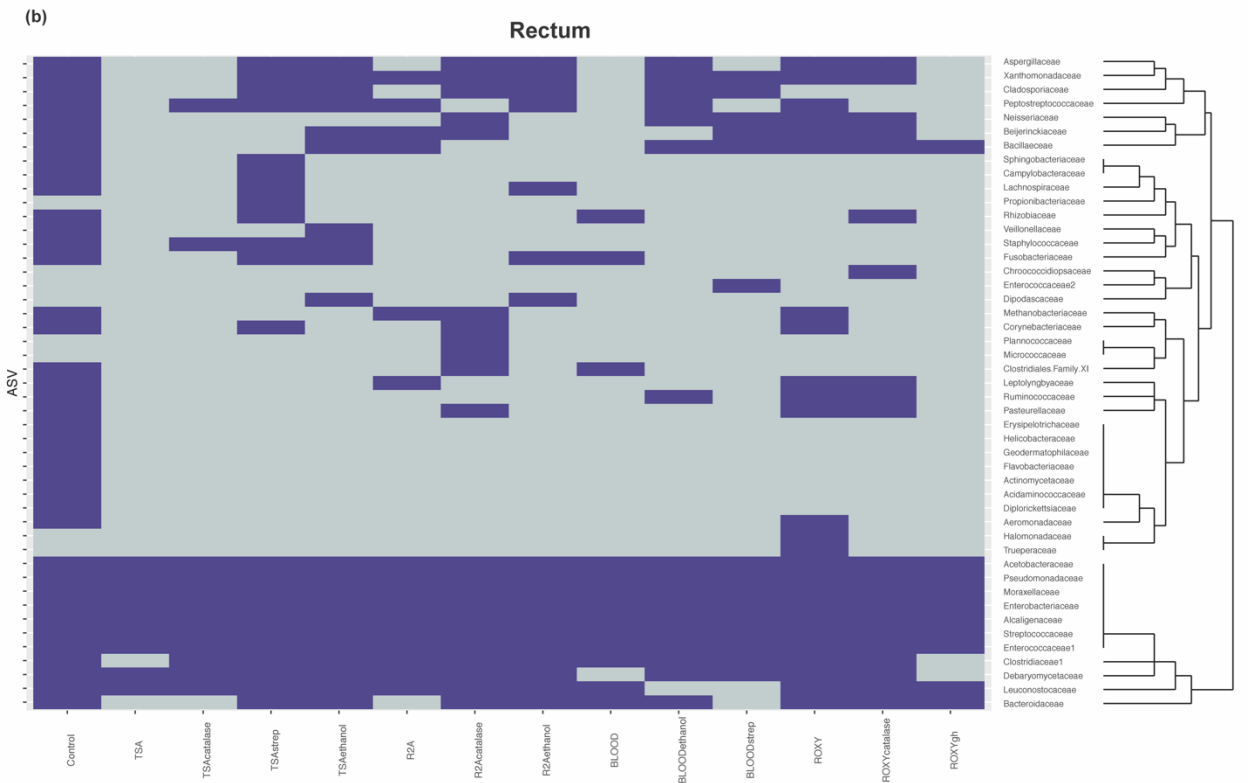

(a) Permanova

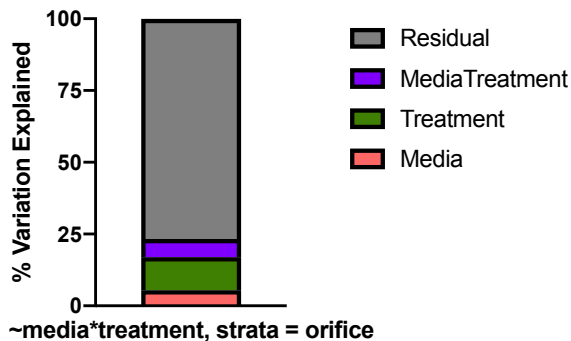

(b) Permanova

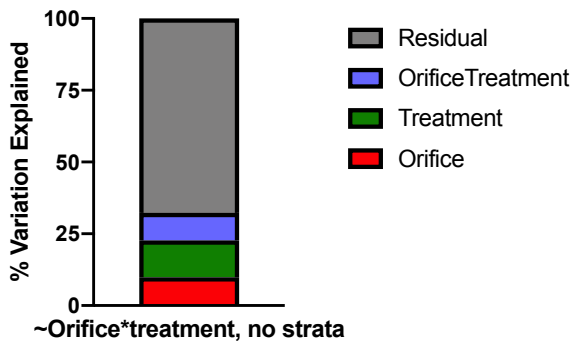

Pairwise Permanova ~Treatment

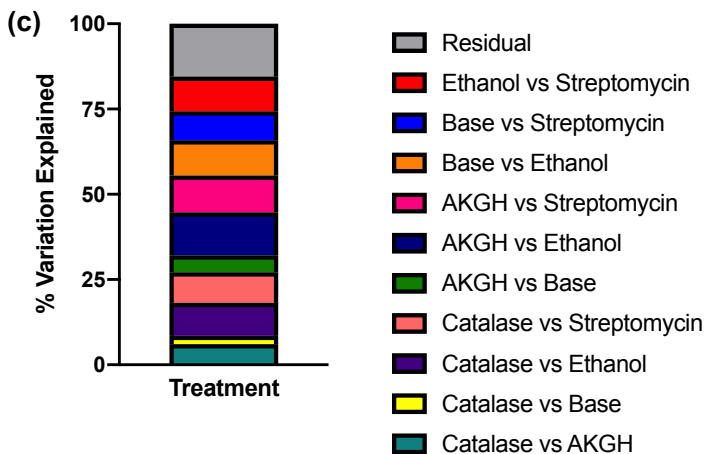

Source: https://www.biorxiv.org/content/10.1101/2020.11.19.390864v2.full.pdf
